# Supplementary material for: Growth Hormone Improves Adipose Tissue Browning and Muscle Wasting in Mice with Chronic Kidney Disease-Associated Cachexia
Source: MDPI journal article supplement (doi:10.3390/ijms232315310), 2022-12-04
Supplement: s1 [file s1]

**Supplemental Table S1: Immunoassay information for blood and serum chemistry, muscle adenosine triphosphate content as well as muscle and adipose tissue protein analysis.**

Blood & Serum chemistry

BUN and creatinine

Assay information

VetScan Comprehensive Diagnostic Profile, Abaxix, 500-0038  
<https://www2.zoetisus.com/content/assets/docs/Diagnostics/package-inserts/VETSCAN-Comprehensive-Diagnostic-Profile-Package-Insert-LBL-02422.pdf>

Muscle & Adipose tissue

ATP Assay Kit (Colorimetric/Fluorometric)  
HSL (phosphor Ser552) Cell based ELISA kit  
Human Growth Hormone ELISA Kit  
JAK2 (phosphor-Tyr221) ELISA kits  
JAK2 ELISA kits  
Mouse Adipose Triglyceride Lipase, ELISA Kit  
Mouse Hormone Sensitive Lipase, ELISA kit  
Mouse STAT5, ELISA kits  
Phosphotyrosine STAT5, ELISA kits  
UCP1 ELISA kits  
UCP3 ELISA kits

Assay information

Abcam, ab83355  
antibodies.com, A102387  
Abcam, ab190811  
Assaybiotech, CytoGlow™, CBP1593  
Antibodies-online.com, ABIN5674893  
MyoBioSource.com, MBS750961  
MyoBioSource.com, MBS720763  
MyoBioSource.com, MBS9354254  
RayBiotech, PEL-Stat5-Y-1  
Aviva Systems Biology, OKCD02970  
Aviva Systems Biology, OKEH05259

**Supplemental Table S2: PCR primer information**

| <u>Gene</u>                     | <u>Forward primer sequence</u> | <u>Reverse primer sequence</u> |
|---------------------------------|--------------------------------|--------------------------------|
| <i>Atf3</i>                     | GAGGATTTTGCTAACCTGACACC        | TTGACGGTAACTGACTCCAGC          |
| <i>Atgl</i>                     | GGATGGCGGCATTTCAGACA           | CAAAGGGTTGGGTTGGTTCAG          |
| <i>Atf2a2</i>                   | GAGAACGCTCACACAAAGACC          | CAATTCGTTGGAGCCCCAT            |
| <i>Atrogin-1</i>                | CAGCTTCGTGAGCGACCTC            | GGCAGTCGAGAAGTCCAGTC           |
| <i>Cidea</i>                    | TGACATTCATGGGATTGCAGAC         | GGCCAGTTGTGATGACTAAGAC         |
| <i>CD137</i>                    | CGTGCGAAGCTCCTGTGATAAC         | GTCCACCTATGCTGGAGAAGG          |
| <i>Csrp3</i>                    | GGGGGAGGTGCAAAATGTG            | CAGGCCATGCAGTGGAACA            |
| <i>Cyfp2</i>                    | ATGACCACCCACGTCACTTGT          | CCTGTCTCGAAGTTCGTGTC           |
| <i>Cox2</i>                     | AACCCAGGGGATCGAGTGT            | CGCAGCTCAGTGTGTTGGAT           |
| <i>Fhl1</i>                     | GACTGCCGCAAGCCATAA             | CCAAGGGGTGAAGGCACTT            |
| <i>Fos</i>                      | TTGAGCGATCATCCCGGTC            | GCGTGAGTCCATACTGGCAAG          |
| <i>Hsl</i>                      | CCAGCCTGAGGGCTTACTG            | CTCCATTGACTGTGACATCTCG         |
| <i>Gng2</i>                     | ACCGCCAGCATAGCACAG             | AGTAGGCCATCAAGTCAGCAG          |
| <i>IGF-I</i>                    | GTGGGGGCTCGTGTCTCTC            | GATCACCGTGCAGTTTTCCA           |
| <i>IL1b</i>                     | GCAACTGTTCTGAACTCAACT          | ATCTTTTGGGGTCCGTCAACT          |
| <i>Il6</i>                      | TAGTCCTTCTACCCCAATTTCC         | TTGGTCTTAGCCACTCCTTC           |
| <i>Itpr1</i>                    | CGTTTTGAGTTTGAAGGCGTTT         | CATCTTGCGCCAATCCCCG            |
| <i>Maff</i>                     | AGGAGGAGGTCATCCGACTG           | CTTCTCGCTCTCCAGAATGTG          |
| <i>Murf-1</i>                   | GTGTGAGGTGCCTACTTGCTC          | GCTCAGTCTTCTGTCTTGGA           |
| <i>Myd88</i>                    | TCATGTTCTCCATACCCTTGGT         | AAACTGCGAGTGGGGTCAG            |
| <i>Myl2</i>                     | ATCGACAAGAATGACCTAAGGGA        | ATTTTTCACGTTCACTCGTCCT         |
| <i>Myod</i>                     | CCACTCCGGGACATAGACTTG          | AAAAGCGCAGGTCTGGTGAG           |
| <i>Myogenin</i>                 | GAGACATCCCCCTATTCTACCA         | GCTCAGTCCGCTCATAGCC            |
| <i>Myostatin</i>                | AGTGGATCTAAATGAGGGCAGT         | GTTTCCAGGCGCAGCTTAC            |
| <i>Pax7</i>                     | TCTCCAAGATTCTGTGCCGAT          | CGGGGTCTCTCTTTATACTCC          |
| <i>Pgc1α</i>                    | TATGGAGTGACATAGAGTGTGCT        | CAGGAGTTGATTCCAGACAGGTA        |
| <i>Pgf2a</i>                    | CTGGACTCATCGAAACACAA           | AGGAAGCCTTTGACTTCTGTCTA        |
| <i>Prdm16</i>                   | CCCCACATTCCGCTGTGAT            | CTCGCAATCCTTGCACTCA            |
| <i>Socs-2</i>                   | GCGCGTCTGGCGAAAGCCCT           | GAAAGTTCCTTCTGGAGCCTCTT        |
| <i>Tbx-1</i>                    | CTGTGGGACGAGTTCAATCAG          | TTGTCATCTACGGGCACAAAG          |
| <i>Tlr2</i>                     | GCAAACGCTGTTCTGCTCAG           | AGGCGTCTCCCTCTATTGTATT         |
| <i>Tmem26</i>                   | TTCCTGTTGCATTCCCTGGTC          | GCCGGAGAAAGCCATTGT             |
| <i>Tnfa</i>                     | CCCTCACACTCAGATCATCTTCT        | GCTACGACGTGGGCTACAG            |
| <i>Tnnc1</i>                    | GCGGTAGAACAGTTGACAGAG          | CCAGCTCCTGGTGCTGAT             |
| <i>Tpm3</i>                     | ACCACCATCGAGGCGGTAA            | CCCTTCTCCGCATCATCA             |
| <i>Traf6</i>                    | AAAGCGAGAGATTCTTCCCTG          | ACTGGGGACAATCACTAGAGC          |
| <i>Gapdh</i> (internal control) | AGGTCGGTGTGAACGATTTG           | TGTAGACCATGTAGTTGAGGTCA        |
